# Supplementary material
Source: Springer Nature journal article supplement (https://www.springermedizin.de/resource/supplementary/12880_2007_50_MOESM1_ESM.pdf/9450430)
Supplement: MOESM1 [file 9450430]

iiV.display

## Class DisplayComponent

[java.lang.Object](#)

↳ [java.awt.Component](#)

↳ [java.awt.Container](#)

↳ [javax.swing.JComponent](#)

↳ **iiV.display.DisplayComponent**

### All Implemented Interfaces:

[CNUFileObject](#), [Croppable](#), [FilterSampling](#), [Flippable](#), [ImageObserver](#), [LocationMapping](#),  
[MenuContainer](#), [Rotatable](#), [Serializable](#), [ShowPointImage](#), [ShowStatus](#), [Zoomable](#)

### Direct Known Subclasses:

[CNUStdImgFile](#), [DisplayColorMap](#), [DisplayColorMapQuilt](#), [DisplayDraw](#),  
[ScriptableDisplayComponent](#), [SingleImg](#)

---

public abstract class **DisplayComponent**

extends [JComponent](#)

implements [ShowStatus](#), [CNUFileObject](#), [Zoomable](#), [Rotatable](#), [FilterSampling](#), [Flippable](#), [Croppable](#),  
[LocationMapping](#), [ShowPointImage](#)

DisplayComponent defines standard routines specific to a components displayed by iiV.

### Since:

iiV1.0

### See Also:

[CNUDisplay](#), [Serialized Form](#)
